# Supplementary material for: A noninvasive fluorescence imaging-based platform measures 3D anisotropic extracellular diffusion
Source: PubMed Central journal article supplement (PMC7997923; doi:10.1038/s41467-021-22221-0), 2021-03-26
Supplement: 41467_2021_22221_MOESM2_ESM.pdf [file 41467_2021_22221_MOESM2_ESM.pdf]

## Reporting Summary

Nature Research wishes to improve the reproducibility of the work that we publish. This form provides structure for consistency and transparency in reporting. For further information on Nature Research policies, see our [Editorial Policies](#) and the [Editorial Policy Checklist](#).

### Statistics

For all statistical analyses, confirm that the following items are present in the figure legend, table legend, main text, or Methods section.

n/a Confirmed

- The exact sample size ( $n$ ) for each experimental group/condition, given as a discrete number and unit of measurement
- A statement on whether measurements were taken from distinct samples or whether the same sample was measured repeatedly
- The statistical test(s) used AND whether they are one- or two-sided  
*Only common tests should be described solely by name; describe more complex techniques in the Methods section.*
- A description of all covariates tested
- A description of any assumptions or corrections, such as tests of normality and adjustment for multiple comparisons
- A full description of the statistical parameters including central tendency (e.g. means) or other basic estimates (e.g. regression coefficient) AND variation (e.g. standard deviation) or associated estimates of uncertainty (e.g. confidence intervals)
- For null hypothesis testing, the test statistic (e.g.  $F$ ,  $t$ ,  $r$ ) with confidence intervals, effect sizes, degrees of freedom and  $P$  value noted  
*Give  $P$  values as exact values whenever suitable.*
- For Bayesian analysis, information on the choice of priors and Markov chain Monte Carlo settings
- For hierarchical and complex designs, identification of the appropriate level for tests and full reporting of outcomes
- Estimates of effect sizes (e.g. Cohen's  $d$ , Pearson's  $r$ ), indicating how they were calculated

*Our web collection on [statistics for biologists](#) contains articles on many of the points above.*

### Software and code

Policy information about [availability of computer code](#)

Data collection

1. Labview 2014 (32 bit) - 3D FRAP data acquisition
2. Leica Application Suite (Version 2.6.3) - 2D FRAP data acquisition
3. Olympus Fluoview (Version 4.2a) - Second harmonic generation imaging
4. Olympus cellSens Standard 1.18 - Polarization and bright field imaging
5. Hitachi S-3700N (Version 7.16) - Scanning electron microscope imaging

Data analysis

1. Matlab 2017a - FRAP data processing and analysis
2. ImageJ (Version 1.52a) - Fiber alignment (coherency coefficient) analysis
3. Imaris (Version 9.3.1) - Generating 3D images from LiFT-FRAP data set
4. Adobe Photoshop CC 2015.5 - Generating all of the videos
5. Origin 2018 - Generating all of the graphs
6. COMSOL Multiphysics 5.4 - Modeling molecular dynamics and concentration distributions
7. Tecplot 360 2010 - Plotting simulation results
8. SPSS (Version 24.0) - Statistical analysis

For manuscripts utilizing custom algorithms or software that are central to the research but not yet described in published literature, software must be made available to editors and reviewers. We strongly encourage code deposition in a community repository (e.g. GitHub). See the Nature Research [guidelines for submitting code & software](#) for further information.

## Data

Policy information about [availability of data](#)

All manuscripts must include a [data availability statement](#). This statement should provide the following information, where applicable:

- Accession codes, unique identifiers, or web links for publicly available datasets
- A list of figures that have associated raw data
- A description of any restrictions on data availability

All resources and raw image data are available from the authors upon reasonable request. Source data for the figures are provided with this paper.

## Field-specific reporting

Please select the one below that is the best fit for your research. If you are not sure, read the appropriate sections before making your selection.

- Life sciences       Behavioural & social sciences       Ecological, evolutionary & environmental sciences

For a reference copy of the document with all sections, see [nature.com/documents/nr-reporting-summary-flat.pdf](https://www.nature.com/documents/nr-reporting-summary-flat.pdf)

## Life sciences study design

All studies must disclose on these points even when the disclosure is negative.

|                 |                                                                                                                                                                                                      |
|-----------------|------------------------------------------------------------------------------------------------------------------------------------------------------------------------------------------------------|
| Sample size     | Sample sizes were estimated based on our previously published FRAP studies (Shi et al. 2010; Shi et al. 2013; Shi et al. 2014). The sample size of each experiment was stated in the figure caption. |
| Data exclusions | No data was excluded.                                                                                                                                                                                |
| Replication     | All measurements were successfully repeated in at least 4 independent samples.                                                                                                                       |
| Randomization   | Scaffolds, rat tail tendons, and porcine corneas were randomly allocated to different groups.                                                                                                        |
| Blinding        | Data collection and analysis were automatically performed through the softwares. Blinding was not applicable.                                                                                        |

## Reporting for specific materials, systems and methods

We require information from authors about some types of materials, experimental systems and methods used in many studies. Here, indicate whether each material, system or method listed is relevant to your study. If you are not sure if a list item applies to your research, read the appropriate section before selecting a response.

### Materials & experimental systems

| n/a                                 | Involvement in the study                                        |
|-------------------------------------|-----------------------------------------------------------------|
| <input checked="" type="checkbox"/> | <input type="checkbox"/> Antibodies                             |
| <input checked="" type="checkbox"/> | <input type="checkbox"/> Eukaryotic cell lines                  |
| <input checked="" type="checkbox"/> | <input type="checkbox"/> Palaeontology and archaeology          |
| <input type="checkbox"/>            | <input checked="" type="checkbox"/> Animals and other organisms |
| <input checked="" type="checkbox"/> | <input type="checkbox"/> Human research participants            |
| <input checked="" type="checkbox"/> | <input type="checkbox"/> Clinical data                          |
| <input checked="" type="checkbox"/> | <input type="checkbox"/> Dual use research of concern           |

### Methods

| n/a                                 | Involvement in the study                        |
|-------------------------------------|-------------------------------------------------|
| <input checked="" type="checkbox"/> | <input type="checkbox"/> ChIP-seq               |
| <input checked="" type="checkbox"/> | <input type="checkbox"/> Flow cytometry         |
| <input checked="" type="checkbox"/> | <input type="checkbox"/> MRI-based neuroimaging |

## Animals and other organisms

Policy information about [studies involving animals](#); [ARRIVE guidelines](#) recommended for reporting animal research

|                         |                                                                                                                                                                                                                                                                                                                                                        |
|-------------------------|--------------------------------------------------------------------------------------------------------------------------------------------------------------------------------------------------------------------------------------------------------------------------------------------------------------------------------------------------------|
| Laboratory animals      | 3-month-old Sprague Dawley rats and 6-month-old Yorkshire pigs                                                                                                                                                                                                                                                                                         |
| Wild animals            | This study did not involve wild animals                                                                                                                                                                                                                                                                                                                |
| Field-collected samples | This study did not involve samples collected from the field                                                                                                                                                                                                                                                                                            |
| Ethics oversight        | The use of animal tissues was approved by Clemson University and Medical University of South Carolina. Rat tails were collected at the conclusion of other IACUC approved research projects at the Medical University of South Carolina. Porcine eyeballs were obtained from a local abattoir. No animals were specifically sacrificed for this study. |

Note that full information on the approval of the study protocol must also be provided in the manuscript.
