# Supplementary material for: A noninvasive fluorescence imaging-based platform measures 3D anisotropic extracellular diffusion
Source: PubMed Central journal article supplement (PMC7997923; doi:10.1038/s41467-021-22221-0), 2021-03-26
Supplement: 41467_2021_22221_MOESM9_ESM.pdf [file 41467_2021_22221_MOESM9_ESM.pdf]

**Title:** Supplementary Movie 1:

**Description:** 3D LiFT-FRAP of sodium fluorescein in 55% glycerol solution. The volume was  $76\ \mu\text{m} \times 76\ \mu\text{m} \times 76\ \mu\text{m}$  and volume rate was 8 Hz. A total of 30 volumes of normalized postbleaching images were displayed.

**Title:** Supplementary Movie 2:

**Description:** 3D LiFT-FRAP of sodium fluorescein in 80% glycerol solution. The volume was  $76\ \mu\text{m} \times 76\ \mu\text{m} \times 76\ \mu\text{m}$  and volume rate was 8 Hz. A total of 76 volumes of normalized postbleaching images were displayed.

**Title:** Supplementary Movie 3:

**Description:** 3D LiFT-FRAP of FD10 in 60% glycerol solution. The volume was  $76\ \mu\text{m} \times 76\ \mu\text{m} \times 76\ \mu\text{m}$  and volume rate was 8 Hz. A total of 76 volumes of normalized postbleaching images were displayed.

**Title:** Supplementary Movie 4:

**Description:** 3D LiFT-FRAP of FD20 in in-situ, native porcine cornea. The volume was  $76\ \mu\text{m} \times 76\ \mu\text{m} \times 76\ \mu\text{m}$  and volume rate was 8 Hz. A total of 40 volumes of normalized postbleaching images were displayed.

**Title:** Supplementary Movie 5:

**Description:** 3D LiFT-FRAP of sodium fluorescein in healthy rat tail tendon. The volume was  $76\ \mu\text{m} \times 76\ \mu\text{m} \times 76\ \mu\text{m}$  and volume rate was 8 Hz. A total of 70 volumes of normalized postbleaching images were displayed.

**Title:** Supplementary Movie 6:

**Description:** 3D LiFT-FRAP of FD20 in fiber-aligned scaffold. The volume was  $76\ \mu\text{m} \times 76\ \mu\text{m} \times 76\ \mu\text{m}$  and volume rate was 8 Hz. A total of 76 volumes of normalized postbleaching images were displayed.
